# Supplementary material
Source: PubMed Central journal article supplement (PMC7511441)
Supplement: NIHMS1608939-supplement-2.pdf [file NIHMS1608939-supplement-2.pdf]

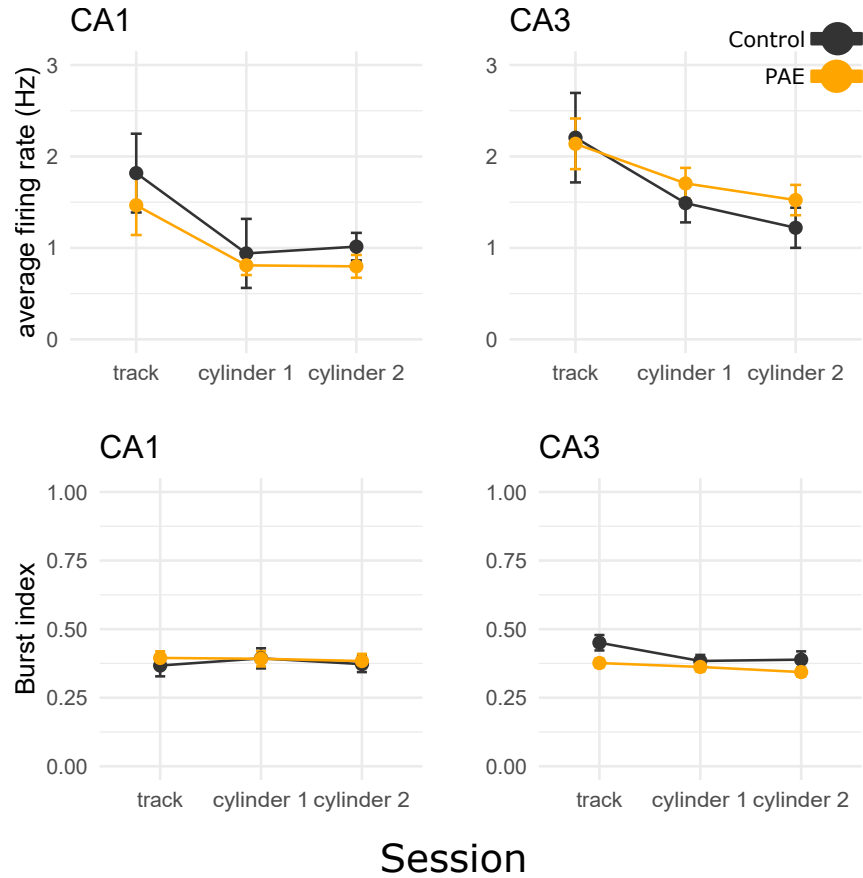

**Figure S1: Average firing rate and burst index over recording sessions. Related to Figure 1.** While CA1 average firing rates were similar between groups across sessions (all  $p \geq 0.03174$ , WRS), CA1 and CA3 cells from both groups displayed decreased average firing rates in the first and second cylinder session compared to the linear track (control:  $p_s < 0.0005$ , PAE:  $p_s < 0.0001$ ; Paired WRS), but had similar rates between cylinder sessions (control:  $p_s \geq 0.0303$ , PAE:  $p_s \geq 0.4357$ , Paired WRS). Burst index was calculated as the difference between the cell's burst rate and the expected burst rate derived from a homogeneous Poisson process with the same average firing rate. Bursts were defined as epochs of spikes with interspike intervals between 0ms and 10ms. Burst index from CA1 and CA3 cells was similar between groups across sessions (all  $p \geq 0.01567$ , WRS). However, control CA3 cells displayed a decrease in burst index from the linear track to the first and second cylinder sessions (all  $p_s \leq 0.0009$ , Paired WRS). Data is represented as median  $\pm$  standard error of the median. Neurons included met place cell criteria in each maze. Family-wise error was maintained at  $\alpha \leq 0.05$  by adjusting the significance levels for individual tests to  $\alpha \leq 0.005$ .

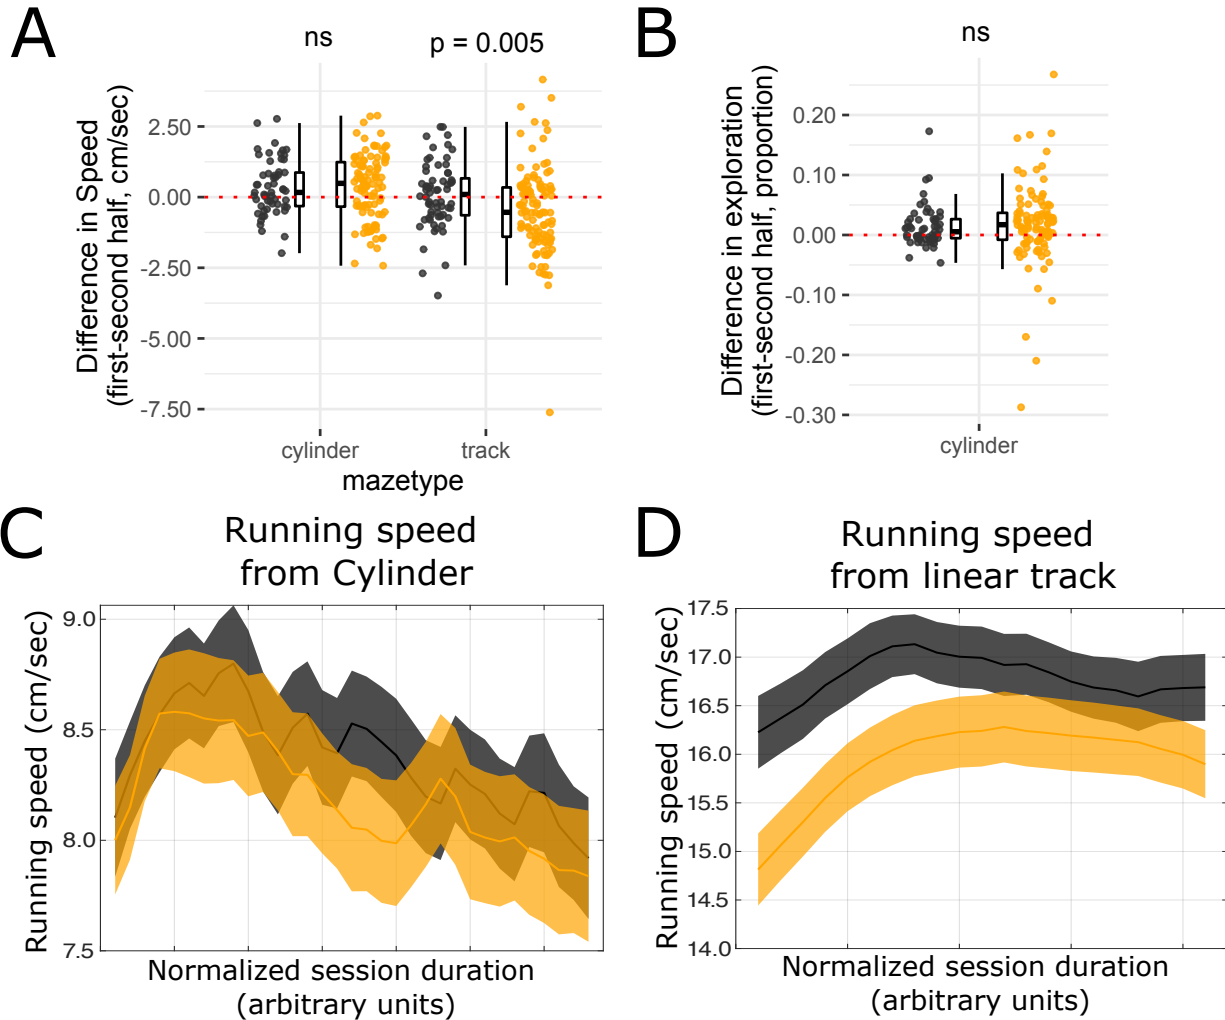

**Figure S2: Behavioral stability between the first and second half of the session. Related to Figure 2.** (A) Difference in running speed between the first and second halves of each recording session. PAE rats have a larger difference in running speed on the linear between the two halves compared to control rats ( $p = 0.005$ , WRS, effect size ( $r$ ) = 0.21, Control median = 0.09,  $n = 64$ ; PAE median = -0.54,  $n = 111$ ). (B) Difference in the proportion of the cylinder explored between the first and second halves of each recording session was similar between groups. Note that both medians are above 0 indicating that exploration was higher in the first half compared to the second half of the session. Linear track data is not shown here because the extent of the track was sampled with each lap and rats from both groups completed similar numbers of laps. (C) Running speed over the duration of the cylinder sessions. (D) Running speed over the duration of the linear track sessions. Note the group difference here reflects the significant difference in A where PAE rats have a slightly slower running speed at the start of the trial. (C-D) Because all recording sessions had slightly different recording durations depending on the rat's motivation, we first calculated mean velocity from each session over 1 minute bins. The resulting speed vectors were linearly interpolated as to have as many points as the longest vector in the set. In effect, we can visualize fluctuations in velocity from the start to the end of each session on the same scale. Data is represented as mean  $\pm$  standard error. (A-D) Orange represents data from PAE rats and black represents data from control animals.

### Mean mle fits of all cells

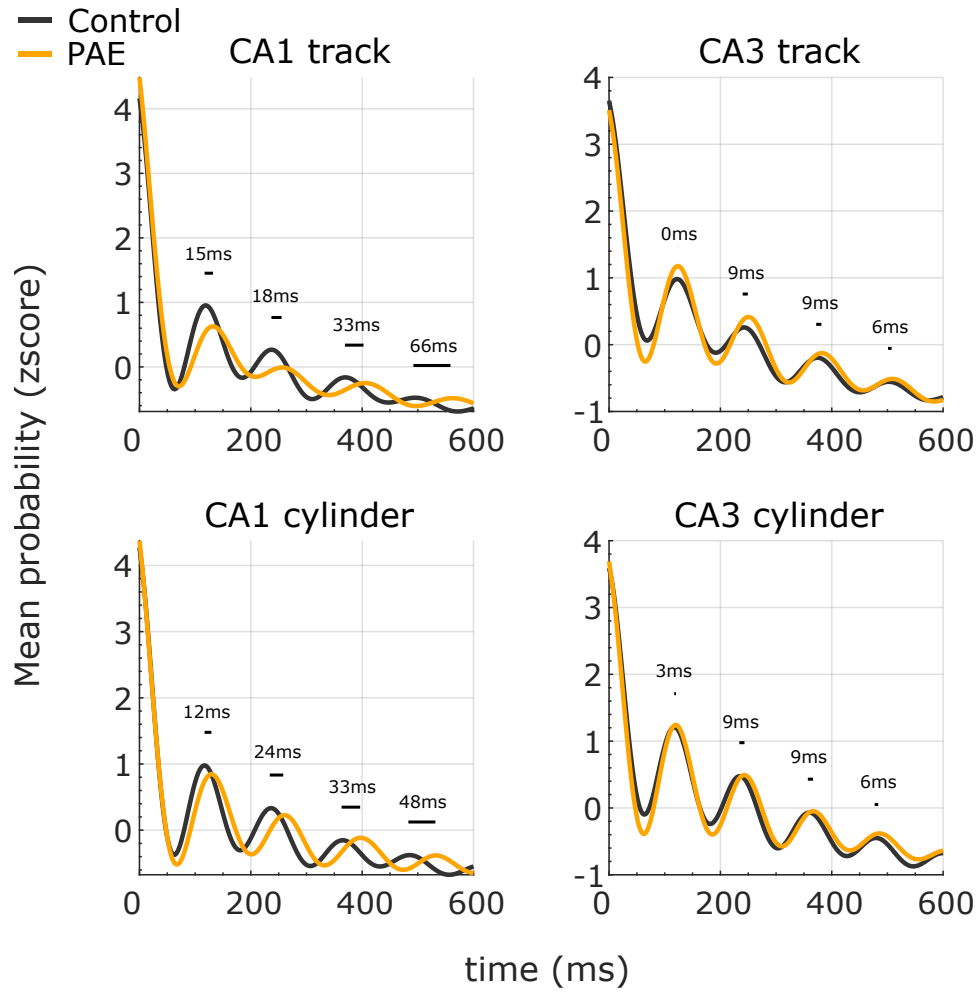

**Figure S3: Mean maximum likelihood estimation fits for all cells. Related to Figure 5.** While Figure 5C shows mean autocorrelogram fits of just spatially modulated cells, here we show mean fits from all theta rhythmic cells. Note that theta frequency is slightly slower in PAE cells. Dashes and numbers above each peak represent the time (ms) difference between the two groups at each theta peak.

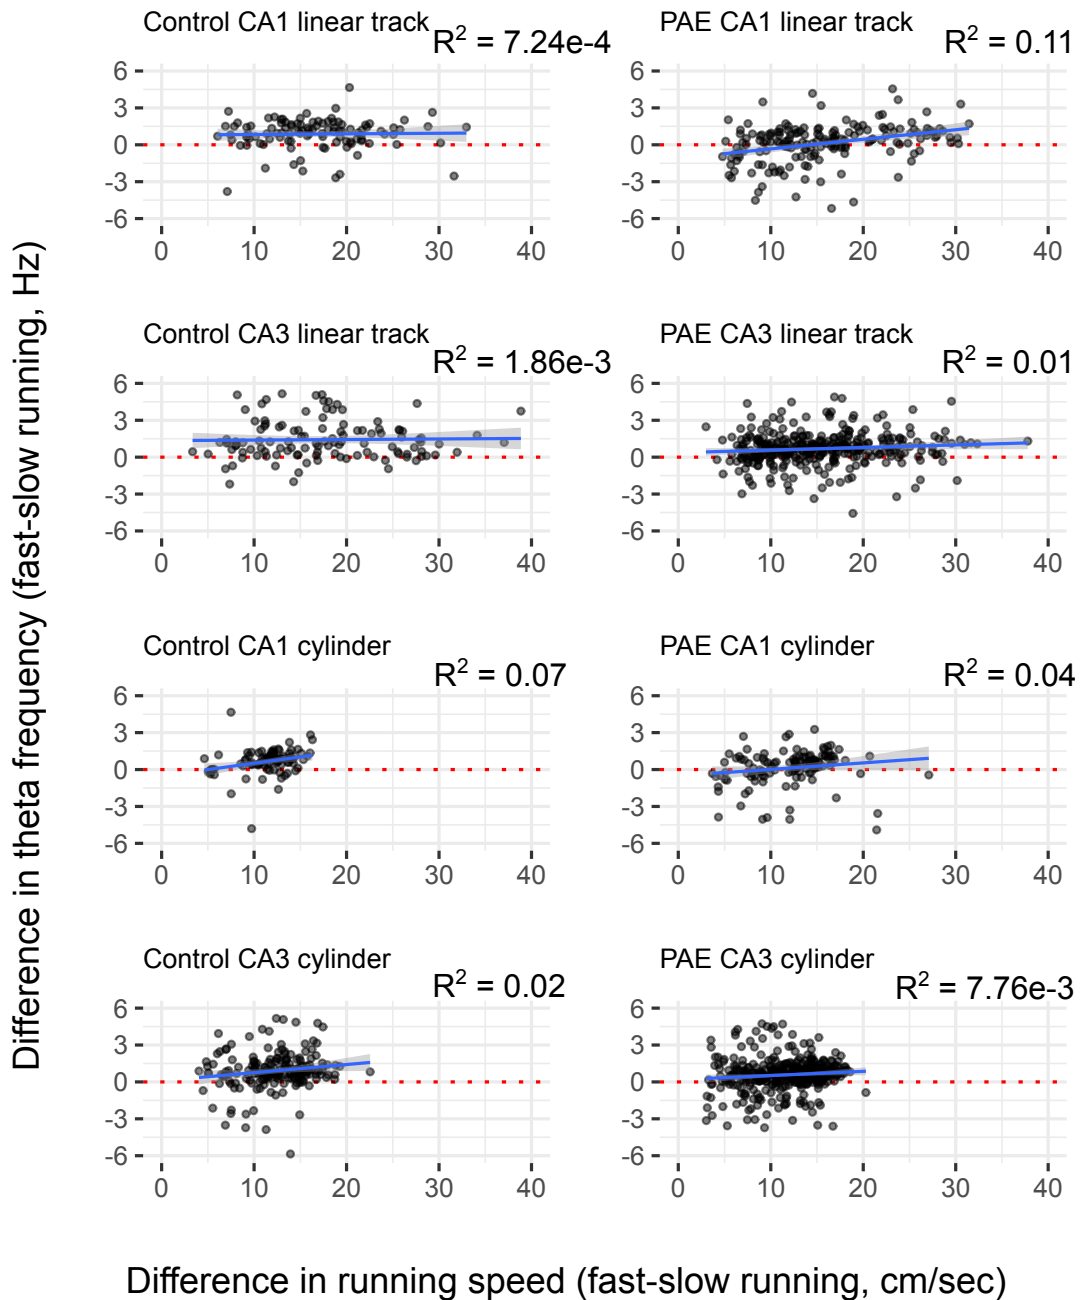

**Figure S4: Association between intrinsic theta frequency and running speed. Related to Figure 6.** Scatter plots show the relationship between the change in theta frequency (Hz) as a function of the magnitude difference between mean fast and slow running speed (cm/s). R-squared ( $R^2$ ) for individual regression analyses are included in each subplot. Note that the change in running speed is a poor predictor of the change in frequency across all groups/conditions (R-squared values are  $\leq 0.11$ ). Values that fall along the red dashed line indicate no change in theta frequency. Line of best fit and corresponding confidence bounds for each regression are plotted in blue.

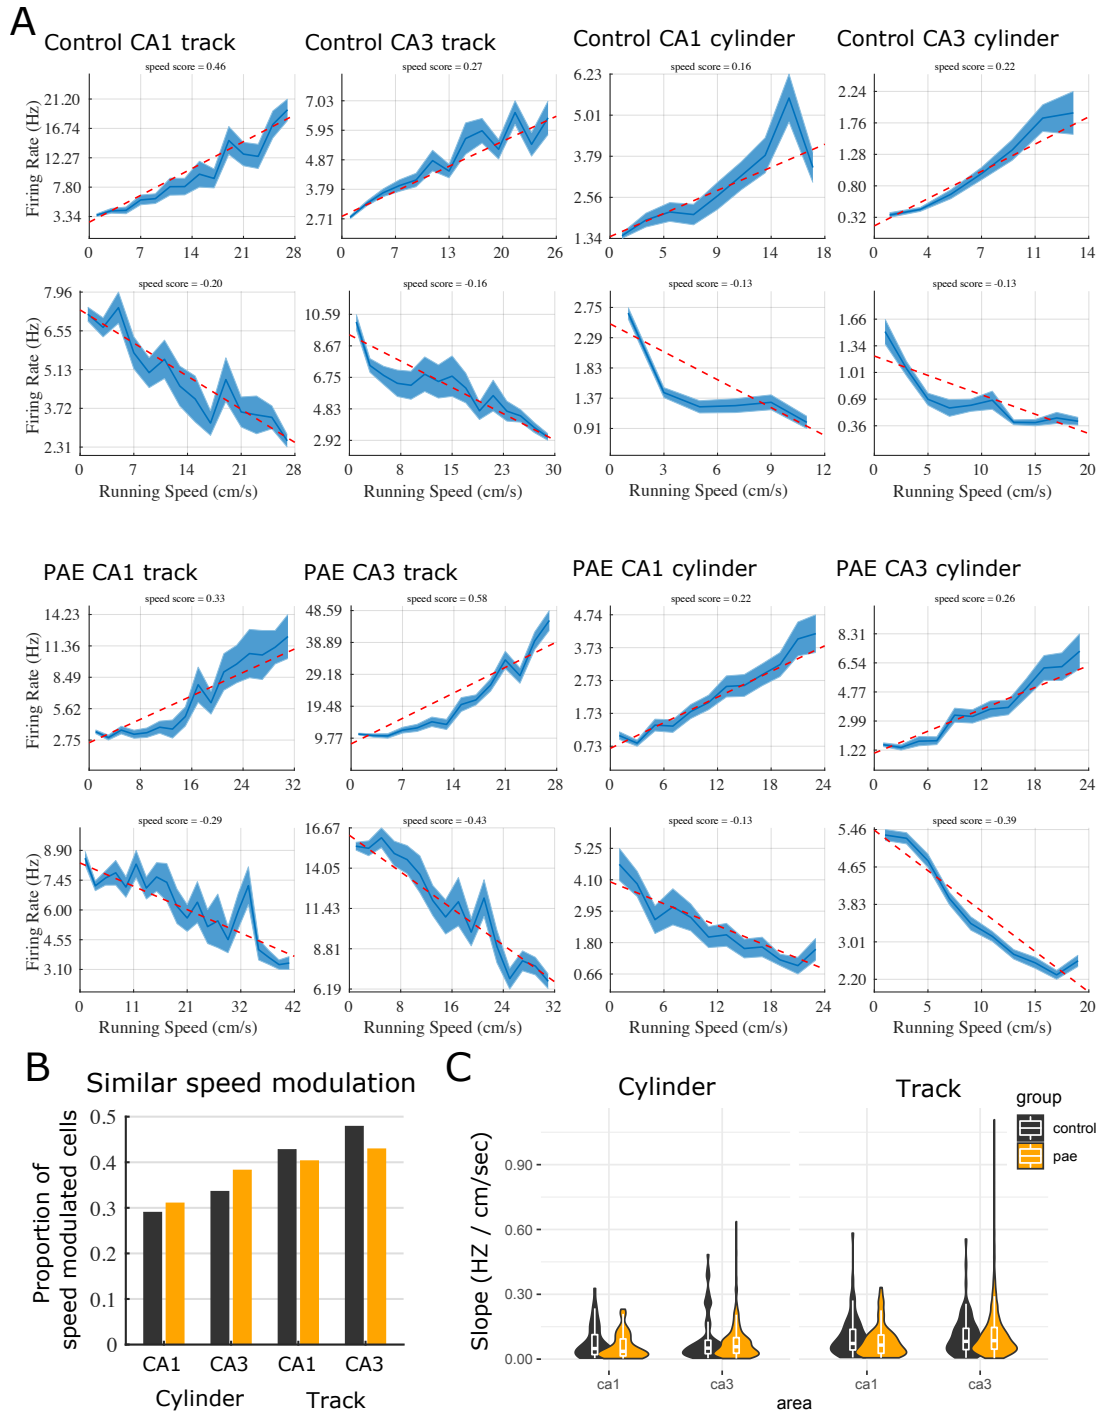

**Figure S5: Speed modulation of HPC place cells are similar between groups. Related to Figure 6.** (A) shows individual examples of positive and negative speed-modulated cells from both groups, HPC subregions, and spatial environments. The dashed red line indicates the linear function fit through the data. The solid blue line indicates the mean response, with blue shading denoting  $\pm$  standard error of the mean. Each cell's "speed score" or speed firing rate correlation ( $r$ ) is indicated above each plot. (B) The proportion of cells that are speed modulated is similar between groups ( $p_s \geq 0.18$ , WRS). (C) Slopes (Hz/cm/sec) are similar between groups ( $p_s \geq 0.098$ , WRS). Slopes here are represented in absolute value.

|                                        | Saccharin Control (n = 9) | 5% Ethanol Group (n = 8) |
|----------------------------------------|---------------------------|--------------------------|
| Daily four-hour 5% ethanol consumption | NA                        | 1.96 ± 0.14 g/kg/d       |
| Maternal weight gain during pregnancy  | 105 ± 7 g                 | 120 ± 7 g                |
| Litter size                            | 10 ± 0.8 live births      | 11.9 ± 0.8 live births   |
| Pup birth weight                       | 7.79 ± 0.38 g             | 7.84 ± 0.56 g            |

**Table S1: Impact of 5% ethanol consumption on maternal weight gain, litter size, and pup birth weight. Related to STAR Methods.** All values are represented as mean ± standard error of the mean.

| Dependent Variable                                   | n               | Parameter estimate  | Test                           | Test statistic | P-value    | Effect measure | Effect size |
|------------------------------------------------------|-----------------|---------------------|--------------------------------|----------------|------------|----------------|-------------|
| Number of laps                                       | C: 64, P: 111   | C: 41, P: 40        | Wilcoxon rank sum test         | 4182           | 0.05036    | r              | 0.147       |
| Linear track velocity                                | C: 64, P: 111   | C: 9.35, P: 9.64    | Wilcoxon rank sum test         | 3292           | 0.4214     | r              | 0.060       |
| Cylinder velocity                                    | C: 57, P: 100   | C: 8.35, P: 8.16    | Wilcoxon rank sum test         | 3041           | 0.4868     | r              | 0.055       |
| Spatial Information Content linear track CA1         | C: 220, P: 421  | C: 0.51, P: 0.51    | Wilcoxon rank sum test         | 48178          | 0.4015     | r              | 0.033       |
| Spatial Information Content linear track CA3         | C: 215, P: 1049 | C: 0.64, P: 0.40    | Wilcoxon rank sum test         | 147395         | 1.234e-12  | r              | 0.199       |
| Spatial Information Content cylinder CA1             | C: 162, P: 306  | C: 0.72, P: 0.72    | Wilcoxon rank sum test         | 24899          | 0.9356     | r              | 0.003       |
| Spatial Information Content cylinder CA3             | C: 247, P: 839  | C: 1.29, P: 0.61    | Wilcoxon rank sum test         | 145298         | <2.2e-16   | r              | 0.291       |
| Sparsity linear track CA1                            | C: 220, P: 421  | C: 0.54, P: 0.55    | Wilcoxon rank sum test         | 45640          | 0.7636     | r              | 0.011       |
| Sparsity linear track CA3                            | C: 215, P: 1049 | C: 0.47, P: 0.60    | Wilcoxon rank sum test         | 79562          | 9.765e-12  | r              | 0.191       |
| Sparsity cylinder CA1                                | C: 162, P: 306  | C: 0.31, P: 0.33    | Wilcoxon rank sum test         | 24907          | 0.931      | r              | 0.004       |
| Sparsity cylinder CA3                                | C: 247, P: 839  | C: 0.20, P: 0.35    | Wilcoxon rank sum test         | 64267          | <2.2e-16   | r              | 0.275       |
| Peak firing rate linear track CA1                    | C: 220, P: 421  | C: 7.62, P: 6.19    | Wilcoxon rank sum test         | 51947          | 0.01134    | r              | 0.100       |
| Peak firing rate linear track CA3                    | C: 215, P: 1049 | C: 11.38, P: 8.17   | Wilcoxon rank sum test         | 137478         | 4.026e-07  | r              | 0.142       |
| Peak firing rate cylinder CA1                        | C: 162, P: 306  | C: 6.83, P: 5.48    | Wilcoxon rank sum test         | 28043          | 0.01931    | r              | 0.108       |
| Peak firing rate cylinder CA3                        | C: 247, P: 839  | C: 9.44, P: 7.39    | Wilcoxon rank sum test         | 120978         | 6.149e-05  | r              | 0.121       |
| Coherence linear track CA1                           | C: 220, P: 421  | C: 2.51, P: 2.42    | Wilcoxon rank sum test         | 50907          | 0.03893    | r              | 0.081       |
| Coherence linear track CA3                           | C: 215, P: 1049 | C: 2.70, P: 2.42    | Wilcoxon rank sum test         | 145828         | 1.2e-11    | r              | 0.190       |
| Coherence cylinder CA1                               | C: 162, P: 306  | C: 2.19, P: 2.02    | Wilcoxon rank sum test         | 29192          | 0.001551   | r              | 0.146       |
| Coherence cylinder CA3                               | C: 247, P: 839  | C: 2.24, P: 2.07    | Wilcoxon rank sum test         | 126441         | 1.38e-07   | r              | 0.159       |
| Stability linear track CA1                           | C: 220, P: 421  | C: 0.79, P: 0.69    | Wilcoxon rank sum test         | 56229          | 8.362e-06  | r              | 0.175       |
| Stability linear track CA3                           | C: 215, P: 1049 | C: 0.83, P: 0.77    | Wilcoxon rank sum test         | 132852         | 3.806e-05  | r              | 0.115       |
| Stability cylinder CA1                               | C: 162, P: 306  | C: 0.43, P: 0.24    | Wilcoxon rank sum test         | 30629          | 2.699e-05  | r              | 0.194       |
| Stability cylinder CA3                               | C: 247, P: 839  | C: 0.52, P: 0.36    | Wilcoxon rank sum test         | 129414         | 2.615e-09  | r              | 0.180       |
| Spatial correlation linear track CA1                 | C: 220, P: 421  | C: 0.16, P: 0.35    | Wilcoxon rank sum test         | 20555          | 0.0001676  | r              | 0.171       |
| Spatial correlation linear track CA3                 | C: 215, P: 1049 | C: 0.21, P: 0.19    | Wilcoxon rank sum test         | 67057          | 0.8464     | r              | 0.006       |
| Directionality index linear track CA1                | C: 220, P: 421  | C: 0.30, P: 0.24    | Wilcoxon rank sum test         | 28819          | 0.06507    | r              | 0.084       |
| Directionality index linear track CA3                | C: 215, P: 1049 | C: 0.32, P: 0.19    | Wilcoxon rank sum test         | 81396          | 1.495e-05  | r              | 0.138       |
| Mean angle of Rotation cylinder CA1                  | C: 96, P: 148   | C: 44.80, P: 82.84  | Watson Williams                | 6.466          | 0.0117     | na             | na          |
| Mean angle of rotation cylinder CA3                  | C: 108, P: 398  | C: 246.40, P: 73.20 | Watson Williams                | 82.087         | <2.2e-16   | na             | na          |
| Distribution of angles CA3 control                   | 108             | na                  | Rayleigh test of nonuniformity | 24.380         | 9.4667e-12 | na             | na          |
| Distribution of angles CA1 PAE                       | 148             | na                  | Rayleigh test of nonuniformity | 3.012          | 0.0488     | na             | na          |
| Distribution of angles CA3 PAE                       | 398             | na                  | Rayleigh test of nonuniformity | 31.677         | 9.4583e-15 | na             | na          |
| Distribution of angles around 90 CA1 control         | 96              | na                  | V test of nonuniformity        | 11.719         | 0.0230     | na             | na          |
| Distribution of angles around 90 CA3 control         | 108             | na                  | V test of nonuniformity        | 59.602         | 2.1244e-12 | na             | na          |
| Distribution of angles around 90 CA1 PAE             | 148             | na                  | V test of nonuniformity        | -16.531        | 0.9878     | na             | na          |
| Distribution of angles around 90 CA3 PAE             | 398             | na                  | V test of nonuniformity        | 107.529        | 1.2434e-14 | na             | na          |
| Normalized delta firing rate CA1                     | C: 96, P: 148   | C: 0.27, P: 0.18    | Wilcoxon rank sum test         | 29859          | 1.939e-05  | r              | 0.199       |
| Normalized delta firing rate CA3                     | C: 108, P: 398  | C: 0.43, P: 0.18    | Wilcoxon rank sum test         | 142264         | <2.2e-16   | r              | 0.275       |
| Delta spatial information content CA1                | C: 96, P: 148   | C: 0.08, P: 0.04    | Wilcoxon rank sum test         | 7512           | 0.2792     | r              | 0.068       |
| Delta spatial information content CA3                | C: 108, P: 398  | C: -0.07, P: 0.02   | Wilcoxon rank sum test         | 26962          | 0.003245   | r              | 0.120       |
| Delta sparsity CA1                                   | C: 96, P: 148   | C: -0.02, P: -0.00  | Wilcoxon rank sum test         | 6532           | 0.4595     | r              | 0.046       |
| Delta sparsity CA3                                   | C: 108, P: 398  | C: 0.02, P: -0.00   | Wilcoxon rank sum test         | 36150          | 0.02879    | r              | 0.089       |
| Proportion of sig. theta cylinder ca1                | C: 162, P: 306  | C: 0.89, P: 0.74    | Chi-squared                    | 13.928         | 1.8988e-04 | V              | 0.020       |
| Proportion of sig. theta cylinder ca3                | C: 247, P: 839  | C: 0.95, P: 0.84    | Chi-squared                    | 32.012         | 1.5319e-08 | V              | 0.018       |
| Proportion of sig. theta linear track ca1            | C: 220, P: 421  | C: 0.84, P: 0.85    | Chi-squared                    | 0.8192         | 0.3654     | V              | 0.001       |
| Proportion of sig. theta linear track ca3            | C: 215, P: 1049 | C: 0.94, P: 0.85    | Chi-squared                    | 15.554         | 8.0171e-05 | V              | 0.009       |
| Theta frequency cylinder ca1                         | C: 162, P: 306  | C: 8.42, P: 7.81    | Wilcoxon rank sum test         | 14755          | 7.215e-10  | r              | 0.360       |
| Theta frequency cylinder ca3                         | C: 247, P: 839  | C: 8.47, P: 8.12    | Wilcoxon rank sum test         | 75874          | 4.921e-10  | r              | 0.226       |
| Theta frequency linear track ca1                     | C: 220, P: 421  | C: 8.44, P: 7.65    | Wilcoxon rank sum test         | 21929          | 5.534e-13  | r              | 0.378       |
| Theta frequency linear track ca3                     | C: 215, P: 1049 | C: 8.41, P: 7.99    | Wilcoxon rank sum test         | 51565          | 1.983e-05  | r              | 0.158       |
| Frequency difference cylinder ca1                    | C: 89, P: 117   | C: 0.80, P: 0.51    | Wilcoxon rank sum test         | 6382           | 0.005565   | r              | 0.193       |
| Frequency difference cylinder ca3                    | C: 179, P: 408  | C: 0.78, P: 0.64    | Wilcoxon rank sum test         | 42457          | 0.001688   | r              | 0.129       |
| Frequency difference linear track ca1                | C: 106, P: 173  | C: 1.02, P: 0.29    | Wilcoxon rank sum test         | 12510          | 3.277e-07  | r              | 0.305       |
| Frequency difference linear track ca3                | C: 115, P: 345  | C: 1.19, P: 0.69    | Wilcoxon rank sum test         | 24804          | 5.76e-05   | r              | 0.187       |
| Proportion speed modulated frequency cylinder ca1    | C: 125, P: 170  | C: 0.47, P: 0.34    | Chi-squared                    | 5.151          | 0.0232     | V              | 0.012       |
| Proportion speed modulated frequency cylinder ca3    | C: 219, P: 552  | C: 0.52, P: 0.43    | Chi-squared                    | 5.251          | 0.0219     | V              | 0.004       |
| Proportion speed modulated frequency track ca1       | C: 129, P: 243  | C: 0.52, P: 0.35    | Chi-squared                    | 10.422         | 0.0012     | V              | 0.019       |
| Proportion speed modulated frequency track ca3       | C: 145, P: 580  | C: 0.43, P: 0.40    | Chi-squared                    | 0.462          | 0.4967     | V              | 4.52e-04    |
| Proportion of sig. phase precession cylinder ca1     | C: 162, P: 306  | C: 0.25, P: 0.17    | Chi-squared                    | 2.489          | 0.1146     | V              | 0.072       |
| Proportion of sig. phase precession cylinder ca3     | C: 247, P: 839  | C: 0.37, P: 0.27    | Chi-squared                    | 14.183         | 0.0001658  | V              | 0.096       |
| Proportion of sig. phase precession linear track ca1 | C: 220, P: 421  | C: 0.28, P: 0.21    | Chi-squared                    | 2.49           | 0.1146     | V              | 0.06        |
| Proportion of sig. phase precession linear track ca3 | C: 215, P: 1049 | C: 0.49, P: 0.37    | Chi-squared                    | 4.706          | 0.03005    | V              | 0.06        |
| Circular-linear correlation cylinder ca1             | C: 162, P: 306  | C: -0.01, P: -0.01  | Wilcoxon rank sum test         | 25599          | 0.5594     | r              | 0.026       |
| Circular-linear correlation cylinder ca3             | C: 247, P: 839  | C: -0.04, P: -0.02  | Wilcoxon rank sum test         | 95289          | 0.05462    | r              | 0.058       |
| Circular-linear correlation linear track ca1         | C: 220, P: 421  | C: 0.01, P: 0.01    | Wilcoxon rank sum test         | 46199          | 0.9604     | r              | 0.001       |
| Circular-linear correlation linear track ca3         | C: 215, P: 1049 | C: 0.01, P: 0.00    | Wilcoxon rank sum test         | 116127         | 0.4909     | r              | 0.019       |

**Table S2: Table showing each statistical test conducted from the main texts. Related to STAR Methods. n = sample sizes, c = control, p = PAE**
